# Supplementary material for: Teaching Magnetoelectric Sensing to Secondary School Students—Considerations for Educational STEM Outreach
Source: MDPI journal article supplement (doi:10.3390/s21217354), 2021-11-05
Supplement: s1 [file s1]

## 1. Before the Experiment

Definition of **piezoelectricity**: \_\_\_\_\_

\_\_\_\_\_

### Task 1

- a) Complete Figure 2 by constructing the charge concentrations  $Q^+$  and  $Q^-$  of the three positive and the three negative charge concentrations respectively.

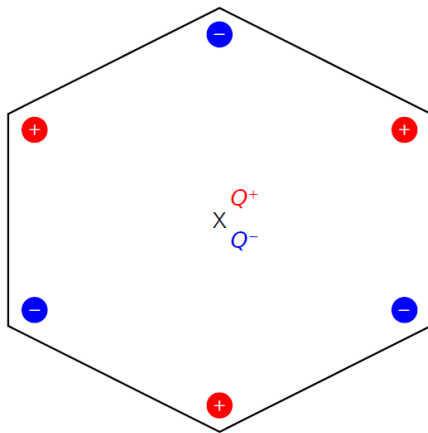

**Figure S1.** Piezoelectric substance without a force being applied.

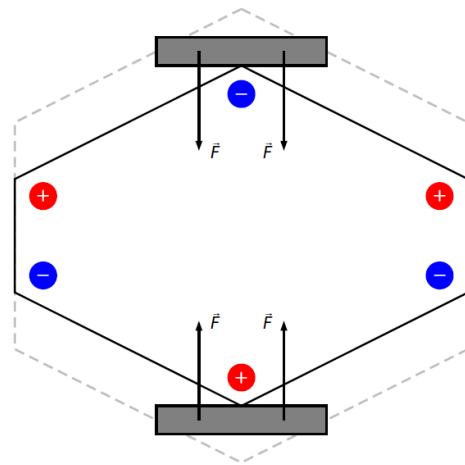

**Figure S2.** Piezoelectric substance when a force  $\vec{F}$  is applied.

- b) In which direction the voltage is formed in Figure 2 – perpendicular, parallel or diagonal to the applied force?

\_\_\_\_\_

### Task 2

In addition to the piezoelectric effect, there is a so-called *inverse piezoelectric effect*. Describe it in your own words.

\_\_\_\_\_

\_\_\_\_\_

\_\_\_\_\_

## 2. After the Experiment

### Task 3

Summarize your observations by noting the relationship between the force exerted and the voltage measured in the following sentence:

The higher the mechanical force on the piezoelectric substance, the \_\_\_\_\_

\_\_\_\_\_.
